# Supplementary material for: Different antibody-associated autoimmune diseases have distinct patterns of T follicular cell dysregulation
Source: PubMed Central journal article supplement (PMC9587230; doi:10.1038/s41598-022-21576-8), 2022-10-21
Supplement: 41598_2022_21576_MOESM1_ESM.pdf [file 41598_2022_21576_MOESM1_ESM.pdf]

## Supplementary Information

### **Different antibody-associated autoimmune diseases have distinct patterns of T follicular cell dysregulation**

Filipa Ribeiro<sup>1,2†</sup>, Vasco C. Romão<sup>1,3†</sup>, Sara Rosa<sup>1</sup>, Kátia Jesus<sup>1</sup>, Ana Água-Doce<sup>1</sup>, Sofia C. Barreira<sup>1,3</sup>, Patrícia Martins<sup>1,3</sup>, Susana Lopes da Silva<sup>1,3</sup>, Ema Nobre<sup>3</sup>, Maria João Bugalho<sup>3</sup>, Válder R. Fonseca<sup>1\*</sup>, João Eurico Fonseca<sup>1,3\*</sup>, Luis Graca<sup>1,2\*</sup>

<sup>1</sup> Instituto de Medicina Molecular João Lobo Antunes, Faculdade de Medicina da Universidade de Lisboa, Lisboa, Portugal

<sup>2</sup> Instituto Gulbenkian de Ciência, Oeiras, Portugal

<sup>3</sup> Hospital de Santa Maria, Centro Hospitalar Lisboa Norte, Lisboa, Portugal

† These authors contributed equally to this work.

\* Joint senior authors.

**A**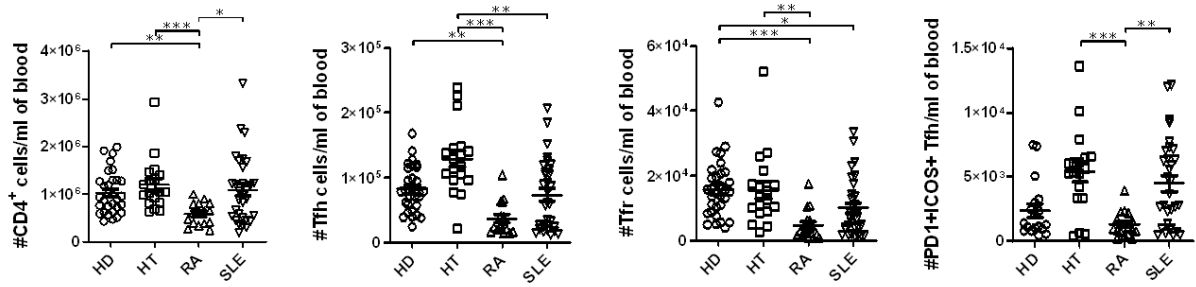**B**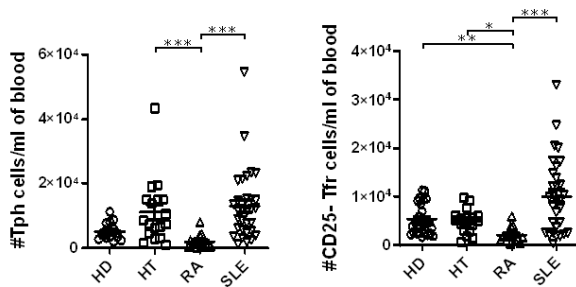

**Supplementary Figure S1. Studied cell populations per volume of blood in the different diseases. (A)** CD4<sup>+</sup> T cells, CD4<sup>+</sup>CXCR5<sup>+</sup>CD25<sup>-</sup>Foxp3<sup>-</sup> Tfh cells, CD4<sup>+</sup>CXCR5<sup>+</sup>CD25<sup>+</sup>Foxp3<sup>+</sup> Tfr cells, and activated PD-1<sup>+</sup>ICOS<sup>+</sup> Tfh cells, **(B)** Tph cells and CXCR5<sup>+</sup>CD25<sup>-</sup>Foxp3<sup>+</sup> T cells per mL of blood of HT (n=18), RA, (n=16) and SLE (n=32) patients and HD controls (A: n=31; B: n=16). Each data point represents an individual subject; bars represent mean±SEM; \* p<0.05, \*\* p<0.01, \*\*\* p<0.001, Kruskal-Wallis one-way analysis of variance (ANOVA) test with Dunn's comparison post-test.

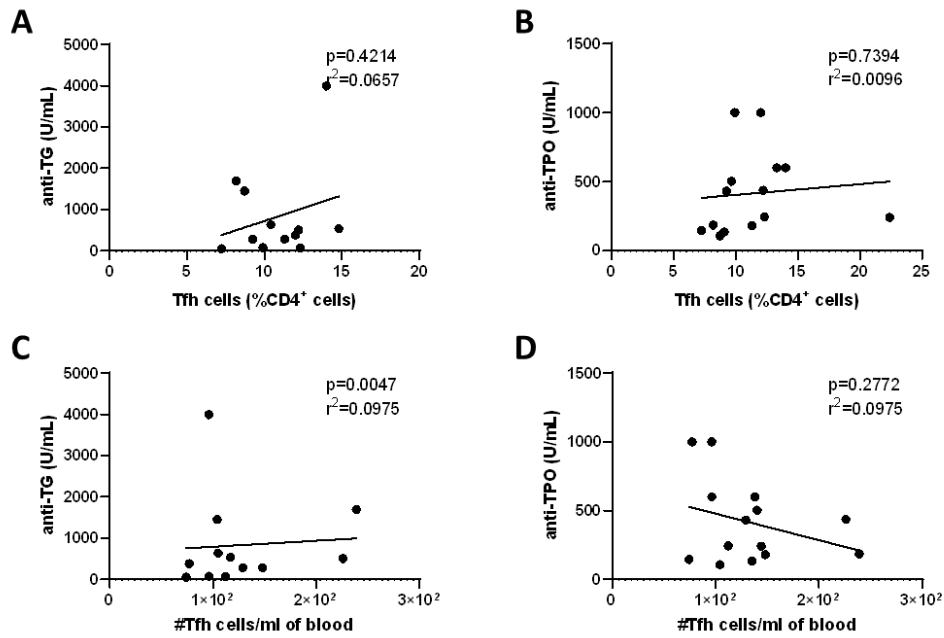

**Supplementary Figure S2. Correlation between serum antibody titers and circulating Tfh cells in HT patients.** Correlation of peripheral blood total Tfh cells, in percentage (A,B) and cell numbers (C,D), with serum anti-TG (n=12; left) and anti-TPO titers (n=14; right) in HT patients. Linear regression is shown in all graphs (p = p-value; r<sup>2</sup> = coefficient of determination).

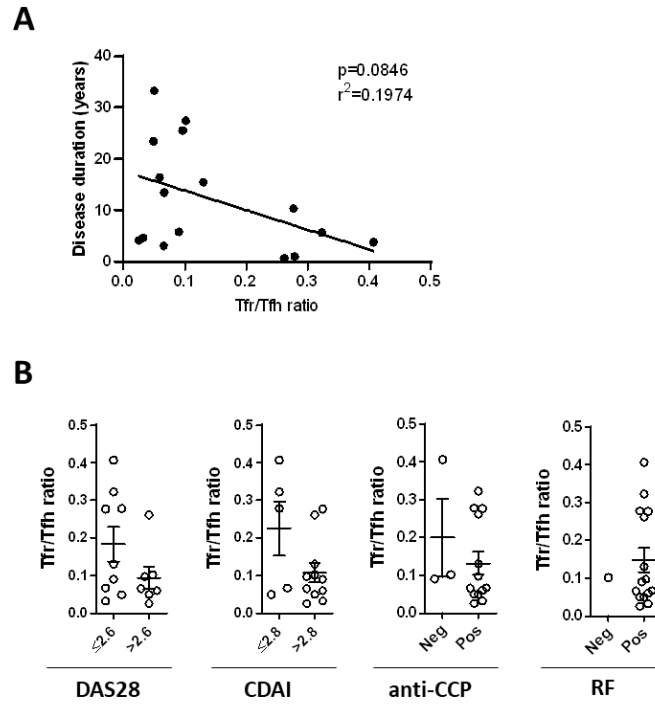

**Supplementary Figure S3. Correlation between clinical parameters and circulating Tfr/Tfh ratio in RA patients.** Heterogeneity of the Tfr/Tfh ratio in peripheral blood of RA patients (n=16) according to their clinical information: **(A)** disease duration and **(B)** Disease Activity Score-28 (DAS28), Clinical Disease Activity Index (CDAI), anti-cyclic citrullinated peptides (anti-CCP) and rheumatoid factor (RF). In **(A)** linear regression is shown. In **(B)**, symbols represent individual subjects; bars represent mean $\pm$ SEM.

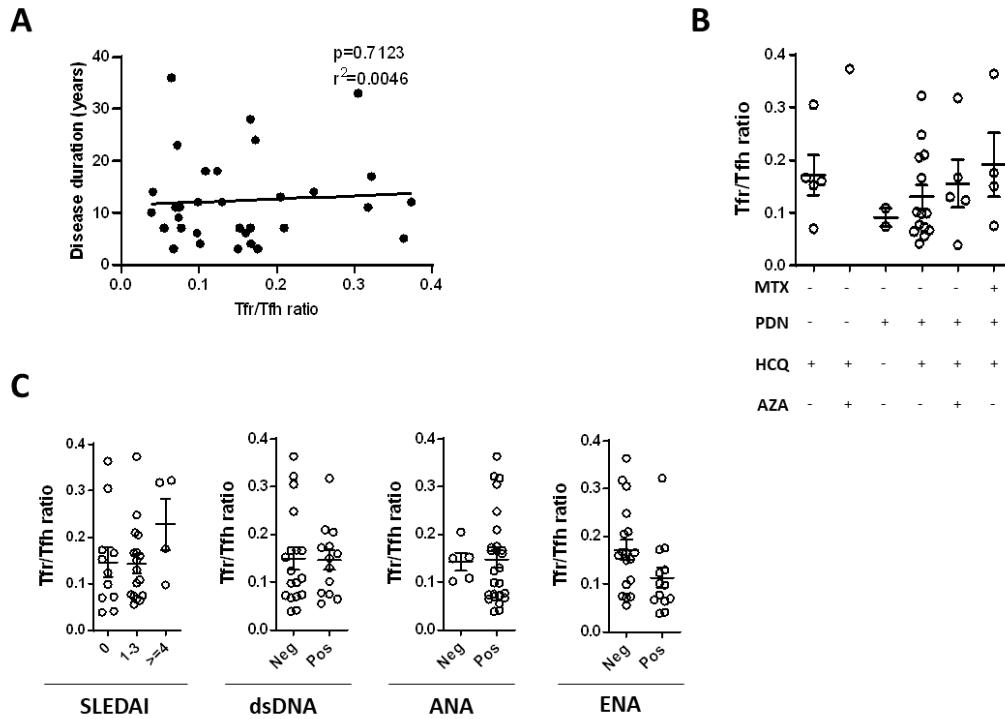

**Supplementary Figure S4. Correlation between clinical parameters and circulating Tfr/Tfh ratio in SLE patients.** Heterogeneity of the Tfr/Tfh ratio in peripheral blood of SLE patients ( $n=32$ ) according to their clinical information: **(A)** disease duration, **(B)** treatments, and **(C)** Systemic Lupus Erythematosus Disease Activity Index (SLEDAI), anti-dsDNA antibodies, anti-nuclear antibodies (ANA) and extractable nuclear antigen antibodies (ENA). MTX = Methotrexate, PDN = Prednisolone, HCQ = Hydroxychloroquine, AZA = Azathioprine. In **(A)** linear regression is shown. In **(B)** and **(C)**, symbols represent individual subjects; bars represent mean $\pm$ SEM.

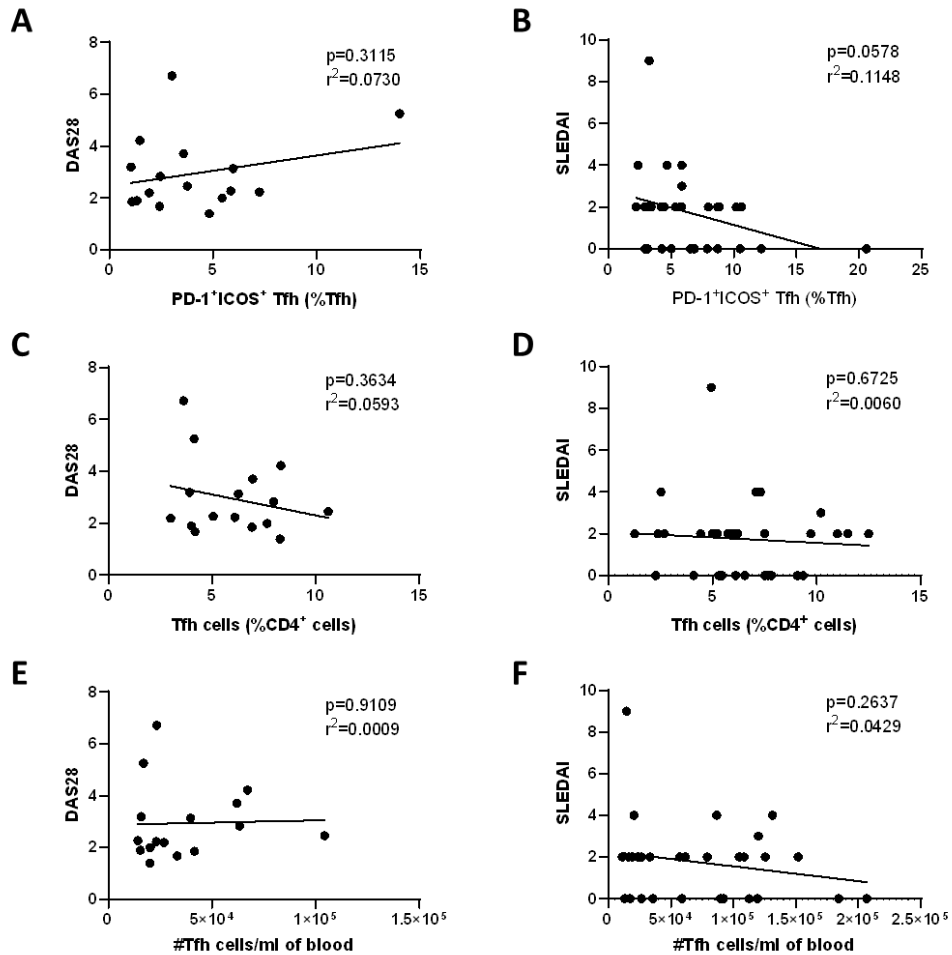

**Supplementary Figure S5. Correlation between disease activity and circulating PD-1<sup>+</sup>ICOS<sup>+</sup> and total Tfh cells in RA and SLE patients.** Correlation of peripheral blood PD-1<sup>+</sup>ICOS<sup>+</sup> Tfh cells (**A,B**) and total Tfh cells, in percentage (**C,D**) and cell numbers (**E,F**), with DAS28 in RA patients (n=16; left) and SLEDAI in SLE patients (n=32; right). Linear regression is shown in all graphs ( $p$  = p-value;  $r^2$  = coefficient of determination).

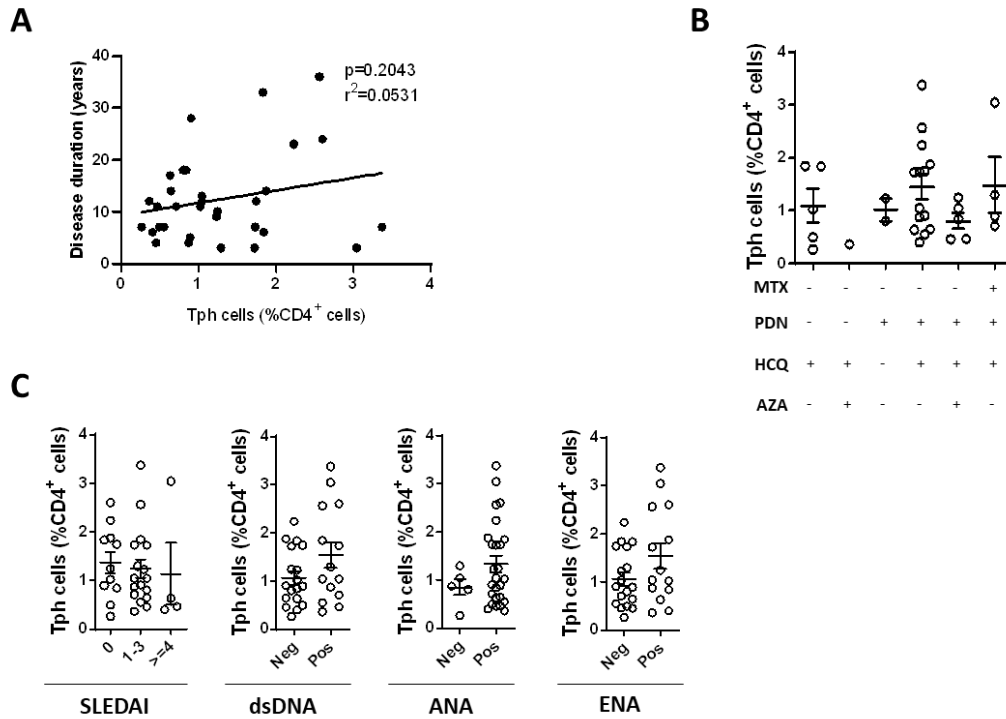

**Supplementary Figure S6. Correlation between clinical parameters and circulating Tph cells in SLE patients.** (A) Heterogeneity of the Tph cell population in peripheral blood of SLE patients (n=32) according to their clinical information: (A) disease duration, (B) treatments, and (C) Systemic Lupus Erythematosus Disease Activity Index (SLEDAI), anti-dsDNA antibodies, anti-nuclear antibodies (ANA) and extractable nuclear antigen antibodies (ENNA). MTX = Methotrexate, PDN = Prednisolone, HCQ = Hydroxychloroquine, AZA = Azathioprine. In (A) linear regression is shown. In (B) and (C), symbols represent individual subjects; bars represent mean±SEM.

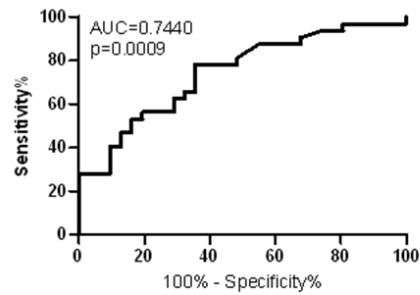

| SLE vs HD                         | Sensitivity | Specificity | Likelihood ratio |
|-----------------------------------|-------------|-------------|------------------|
| CD25 <sup>+</sup> Tfr $\geq$ 0.61 | 62.50       | 70.97       | 2.153            |

**Supplementary Figure S7. CD25<sup>+</sup> Tfr cells as a biomarker of SLE.** ROC curve for prediction of SLE diagnosis (SLE vs HD) based on CD25<sup>+</sup> Tfr cells (AUC = area under the curve). Shown are percentages of sensitivity, specificity and likelihood ratio based on given cutoff.



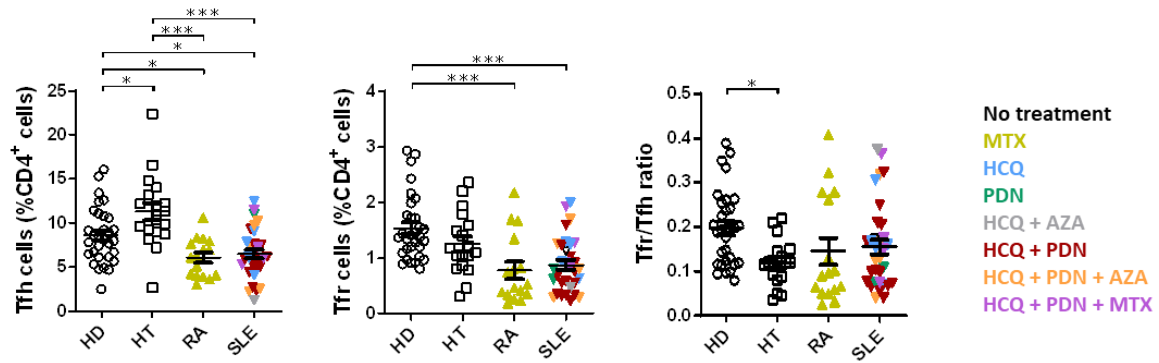

**Supplementary Figure S8. Heterogeneity of circulating Tfh and Tfr cells of SS, RA, SLE, and HT and diversity of ongoing treatments.** Frequency of CD4<sup>+</sup>CXCR5<sup>+</sup>CD25<sup>-</sup>Foxp3<sup>-</sup> Tfh cells and CD4<sup>+</sup>CXCR5<sup>+</sup>CD25<sup>+</sup>Foxp3<sup>+</sup> Tfr cells in peripheral blood of HD (n=31) and HT (n=18), RA (n=16) and SLE (n=32) patients (as described in Figure 1) colored by ongoing treatments. MTX = Methotrexate, HCQ = Hydroxychloroquine, PDN = Prednisolone, AZA = Azathioprine. All patients with HT are on levothyroxine treatment (not shown). Each data point represents an individual subject. Each data point represents individual subjects; bars represent mean±SEM. \* p<0.05, \*\* p<0.01, \*\*\* p<0.001, Kruskal-Wallis test with Dunn's comparison post-test was applied.
